# Supplementary material for: Interaction between the cellular E3 ubiquitin ligase SIAH-1 and the viral immediate-early protein ICP0 enables efficient replication of Herpes Simplex Virus type 2 in vivo
Source: PubMed Central journal article supplement (PMC6078308; doi:10.1371/journal.pone.0201880), 2018-08-06
Supplement: pone.0201880.s001.pdf [file pone.0201880.s001.pdf]

| Transfer plasmid                     | Resulting virus                    |
|--------------------------------------|------------------------------------|
| pICP0hom-ICP0-GFP                    | HSV-2 -ICP0-GFP                    |
| pICP0hom-ICP0 <sup>NxN1/2</sup> -GFP | HSV-2 -ICP0 <sup>NxN1/2</sup> -GFP |
| pICP0hom-ICP0 <sup>NxN1</sup> -GFP   | HSV-2 -ICP0 <sup>NxN1</sup> -GFP   |
| pICP0hom-ICP0 <sup>NxN2</sup> -GFP   | HSV-2 -ICP0 <sup>NxN2</sup> -GFP   |
