# Supplementary material for: Interaction between the cellular E3 ubiquitin ligase SIAH-1 and the viral immediate-early protein ICP0 enables efficient replication of Herpes Simplex Virus type 2 in vivo
Source: PubMed Central journal article supplement (PMC6078308; doi:10.1371/journal.pone.0201880), 2018-08-06
Supplement: pone.0201880.s002.pdf [file pone.0201880.s002.pdf]

| Virus                             | Titer (pfu/ml)       |                     |                     |
|-----------------------------------|----------------------|---------------------|---------------------|
|                                   | U2OS                 | Vero                | HepaRG              |
| HSV-2 strain MS                   | 2.8x10 <sup>7</sup>  | 3.5x10 <sup>7</sup> | n.d.                |
| HSV-2-ICP0-GFP                    | 1.85x10 <sup>8</sup> | 1.9x10 <sup>8</sup> | 4.9x10 <sup>7</sup> |
| HSV-2-ICP0 <sup>NxN1/2</sup> -GFP | 1.53x10 <sup>8</sup> | 1.5x10 <sup>8</sup> | 6.0x10 <sup>7</sup> |
| HSV-2-GFP-ICP0 <sup>Δ19-162</sup> | 1.5x10 <sup>7</sup>  | 3.0x10 <sup>5</sup> | n.d.                |
