# Supplementary material for: Interaction between the cellular E3 ubiquitin ligase SIAH-1 and the viral immediate-early protein ICP0 enables efficient replication of Herpes Simplex Virus type 2 in vivo
Source: PubMed Central journal article supplement (PMC6078308; doi:10.1371/journal.pone.0201880), 2018-08-06

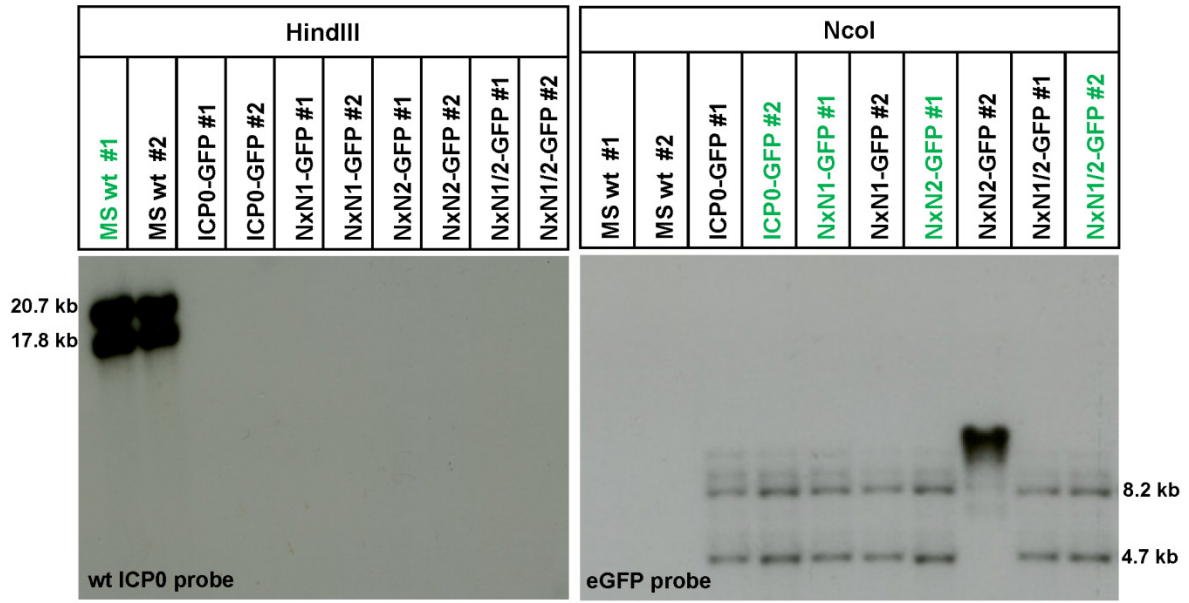

Supplement: pone.0201880.s003.pdf [file pone.0201880.s003.pdf]
